# Supplementary material for: Pharmacokinetic Evaluation of Clozapine in Concomitant Use of Radix Rehmanniae, Fructus Schisandrae, Radix Bupleuri, or Fructus Gardeniae in Rats
Source: PubMed Central journal article supplement (PMC6272930; doi:10.3390/molecules21060696), 2016-05-27
Supplement: molecules-21-00696-s001.pdf [file molecules-21-00696-s001.pdf]

## Supplementary Materials: Pharmacokinetic Evaluation of Clozapine in Concomitant Use of *Radix Rehmanniae*, *Fructus Schisandrae*, *Radix Bupleuri*, or *Fructus Gardeniae* in Rats

Dan-Dan Tian, Wei Wang, Hua-Ning Wang, Stephen Cho Wing Sze and Zhang-Jin Zhang

**Table S1.** Metabolism ratios at different sample collection times after an intraperitoneal dose of 10 mg/kg clozapine to rats with or without *Radix Rehmanniae* (RR), *Fructus Schisandrae* (FS), *Radix Bupleuri* (RB), or *Fructus Gardeniae* (FG) <sup>a</sup>.

| Time (h)        | CLZ alone (n = 5) | RR + CLZ (n = 4) | FS + CLZ (n = 6)      | RB + CLZ (n = 6)      | FG + CLZ (n = 4)      |
|-----------------|-------------------|------------------|-----------------------|-----------------------|-----------------------|
| NorCLZ/CLZ      |                   |                  |                       |                       |                       |
| 0.083           | 1.90 ± 0.59       | 2.51 ± 0.67      | 0.56 ± 0.30           | 0.93 ± 0.33           | 3.65 ± 3.15           |
| 0.25            | 3.68 ± 1.01       | 4.63 ± 0.86      | 1.36 ± 0.46 (0.044) * | 1.41 ± 0.47 (0.049) * | 2.23 ± 1.34           |
| 0.5             | 3.55 ± 0.96       | 4.22 ± 0.63      | 1.85 ± 0.24           | 1.29 ± 0.43           | 1.55 ± 0.84           |
| 1               | 3.35 ± 1.05       | 3.58 ± 0.46      | 1.54 ± 0.66           | 1.45 ± 0.5            | 2.14 ± 1.34           |
| 2               | 3.17 ± 0.97       | 2.84 ± 0.49      | 1.48 ± 0.56           | 1.08 ± 0.32           | 0.91 ± 0.56           |
| 4               | 4.79 ± 1.95       | 2.72 ± 0.42      | 1.36 ± 0.44           | 0.97 ± 0.28           | 2.07 ± 1.12           |
| 6               | 1.80 ± 0.23       | 2.29 ± 0.08      | 1.05 ± 0.40           | 0.89 ± 0.27           | 1.25 ± 0.51           |
| CLZ N-oxide/CLZ |                   |                  |                       |                       |                       |
| 0.083           | 0.07 ± 0.02       | 0.09 ± 0.03      | 0.03 ± 0.02           | 0.05 ± 0.03           | 0.14 ± 0.12           |
| 0.25            | 0.19 ± 0.05       | 0.21 ± 0.05      | 0.09 ± 0.03           | 0.08 ± 0.03           | 0.12 ± 0.07           |
| 0.5             | 0.14 ± 0.03       | 0.13 ± 0.02      | 0.09 ± 0.01           | 0.05 ± 0.02           | 0.10 ± 0.06           |
| 1               | 0.08 ± 0.02       | 0.04 ± 0         | 0.05 ± 0.02           | 0.03 ± 0.01 (0.046) * | 0.03 ± 0.03           |
| 2               | 0.04 ± 0.01       | 0.02 ± 0         | 0.04 ± 0.01           | 0.01 ± 0 (0.025) *    | 0.01 ± 0.01 (0.036) * |
| 4               | 0.01 ± 0.01       | 0                | 0                     | 0                     | 0                     |
| 6               | 0                 | 0                | 0                     | 0                     | n/a <sup>b</sup>      |

<sup>a</sup>. Data are expressed as mean ± SEM and analyzed using one-way ANOVA. \* *p* value compared with the CLZ alone group. <sup>b</sup>. Not applicable.

**Table S2.** Metabolism ratios at different sample collection times after intraperitoneal administration of 10 mg/kg clozapine to rats for 11 days with or without *Radix Rehmanniae* (RR), *Fructus Schisandrae* (FS), *Radix Bupleuri* (RB), or *Fructus Gardeniae* (FG) <sup>a</sup>.

| Time (h)        | CLZ Alone (n = 5) | RR + CLZ (n = 6) | FS + CLZ (n = 4) | RB + CLZ (n = 4) | FG + CLZ (n = 4) |
|-----------------|-------------------|------------------|------------------|------------------|------------------|
| NorCLZ/CLZ      |                   |                  |                  |                  |                  |
| 0.083           | 1.54 ± 0.29       | 3.14 ± 1.59      | 2.11 ± 0.23      | 2.03 ± 0.74      | 0.83 ± 0.13      |
| 0.25            | 3.46 ± 0.54       | 4 ± 0.73         | 3.99 ± 0.21      | 3.27 ± 1.14      | 1.96 ± 0.33      |
| 0.5             | 3.62 ± 0.43       | 4.81 ± 0.94      | 3.99 ± 0.4       | 3.41 ± 1.23      | 2.37 ± 0.42      |
| 1               | 3.53 ± 0.42       | 4.63 ± 0.94      | 3.92 ± 0.35      | 3.34 ± 1.2       | 2.95 ± 0.29      |
| 2               | 3.32 ± 0.37       | 4.72 ± 1.14      | 3.88 ± 0.47      | 3.02 ± 0.92      | 3.33 ± 0.24      |
| 4               | 5.58 ± 1.15       | 6.35 ± 1.96      | 4.42 ± 0.86      | 4.34 ± 1.43      | 4.13 ± 0.56      |
| 6               | 4.66 ± 0.98       | 6.75 ± 2.84      | 7.78 ± 1.88      | 3.52 ± 0.93      | 3.86 ± 1.16      |
| CLZ N-oxide/CLZ |                   |                  |                  |                  |                  |
| 0.083           | 0.06 ± 0.01       | 0.08 ± 0.04      | 0.10 ± 0.02      | 0.09 ± 0.03      | 0.03 ± 0.01      |
| 0.25            | 0.23 ± 0.05       | 0.15 ± 0.02      | 0.18 ± 0.02      | 0.21 ± 0.07      | 0.12 ± 0.03      |
| 0.5             | 0.12 ± 0.03       | 0.15 ± 0.03      | 0.14 ± 0.02      | 0.13 ± 0.04      | 0.12 ± 0.03      |
| 1               | 0.07 ± 0.01       | 0.08 ± 0.01      | 0.09 ± 0.02      | 0.07 ± 0.02      | 0.08 ± 0.02      |
| 2               | 0.05 ± 0.01       | 0.06 ± 0.01      | 0.06 ± 0         | 0.05 ± 0.01      | 0.04 ± 0.01      |
| 4               | 0.02 ± 0.01       | 0.03 ± 0.01      | 0.03 ± 0.01      | 0                | 0                |
| 6               | 0                 | 0.01 ± 0.01      | 0                | 0                | 0                |

<sup>a</sup>. Data are expressed as mean ± SEM and analyzed using one-way ANOVA.
